# Supplementary material for: Ultrathin tungsten oxide nanowires: oleylamine assisted nonhydrolytic growth, oxygen vacancies and good photocatalytic properties
Source: Royal Society of Chemistry journal article supplement (doi:10.1039/c5ra12993a), 2015-01-01
Supplement: c5ra12993a1.pdf [file c5ra12993a1.pdf]

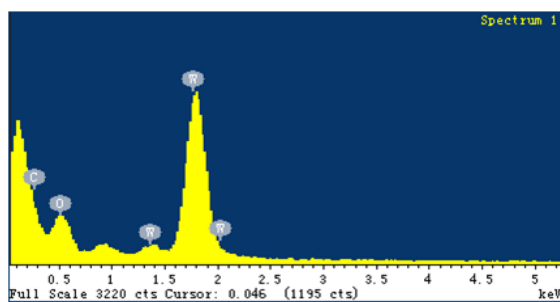

Fig. S1 EDS analysis of  $\text{WO}_{3-x}$  (1-2) nanowires.

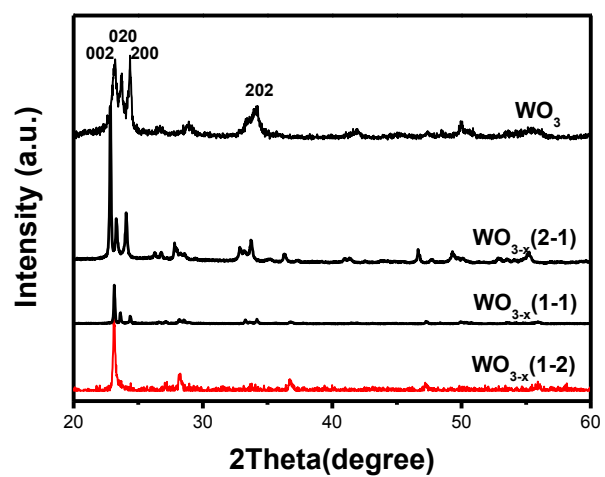

Fig. S2 XRD patterns of  $WO_3$  (reference sample) and  $WO_{3-x}$  nanowires.

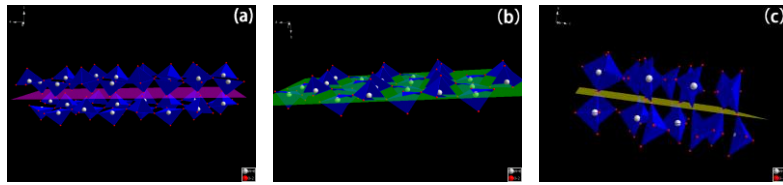

Fig. S3 Schematics of (002) (a), (020) (b), and (200) plane (c).

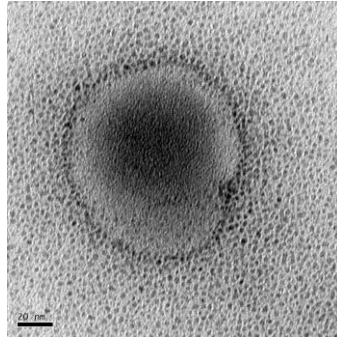

Fig. S4 TEM image of  $\text{WO}_{3-x}$  (1-2) nanowires in formamide.

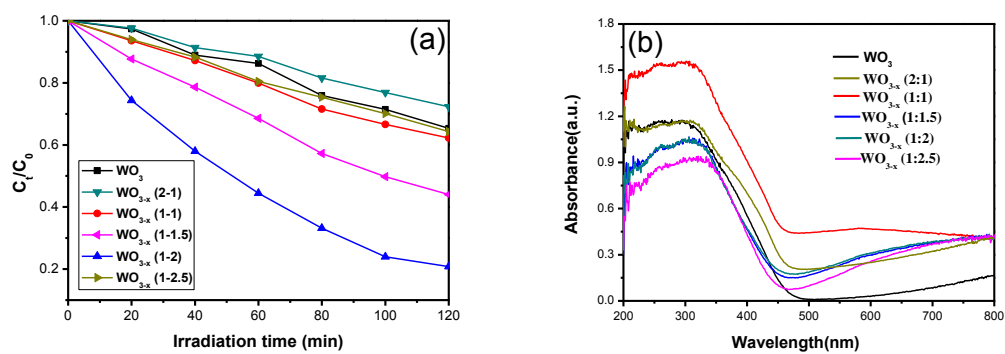

Fig.S5 The degradation of RhB (a), and UV-Vis diffusive reflectance spectra of all tungsten oxides samples(b).

Table S1 A Comparison of BET surface area of WO<sub>3</sub> nanosheets (reference) and nanowires.

| Samples                              | WO <sub>3</sub> (reference) | WO <sub>3</sub> (1-1) nanowires | WO <sub>3</sub> (1-2) nanowires | WO <sub>3</sub> (1-2.5) nanowires |
|--------------------------------------|-----------------------------|---------------------------------|---------------------------------|-----------------------------------|
| S <sub>BET</sub> (m <sup>2</sup> /g) | 22.68                       | 9.33                            | 20.1                            | 8.95                              |
